# Supplementary material
Source: publisher figshare collection journal article supplement (https://karger.figshare.com/ndownloader/files/11652377)
Supplement: Supplementary file 1 [file 11652377]

**Supplemental Table 2.** Staging System for Adrenocortical Carcinoma: European Network for the Study of Adrenal Tumors Classification (ENSAT)

| **Stage** | **ENSAT** |
| --- | --- |
| I | T1, N0, M0 |
| II | T2, N0, M0 |
| III | T1-2, N1, M0  T3-4, N0-N1, M0 |
| IV | T1-T4, N0-N1, M1 |

T1, tumor ≤ 5 cm; T2, tumor >5 cm; T3, tumor infiltration into surrounding tissue or displaying positive regional lymph nodes or tumor thrombus in the vena cava /renal vein; T4, tumors with distant metastases; N0, no positive lymph nodes; N1, positive lymph node(s); M0, no distant metastases; M1, presence of distant metastasis.
